# Supplementary material for: Benchmarking Conditioners in Liang–Kleeman Information Flow: Application to Land–Atmosphere Interactions
Source: Copernicus journal article supplement (doi:10.5194/egusphere-2026-267), 2026-01-26
Supplement: Supplementary file 1 [file egusphere-2026-267-supplement.pdf]

Supplementary Figures S1–S4 supporting the Information Flow analysis presented in the main manuscript.

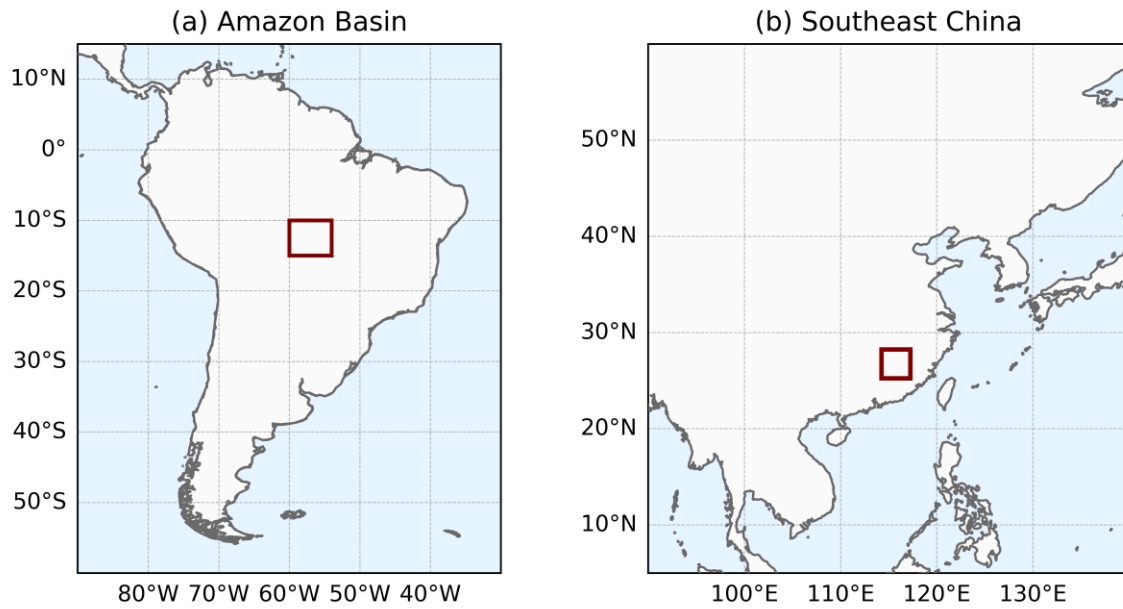

Fig. S1. Location of the two humid-forest study regions. (a) Amazon Basin (54–60°W, 10–15°S) and (b) southeast China (114.25–117.25°E, 25.25–28.25°N).

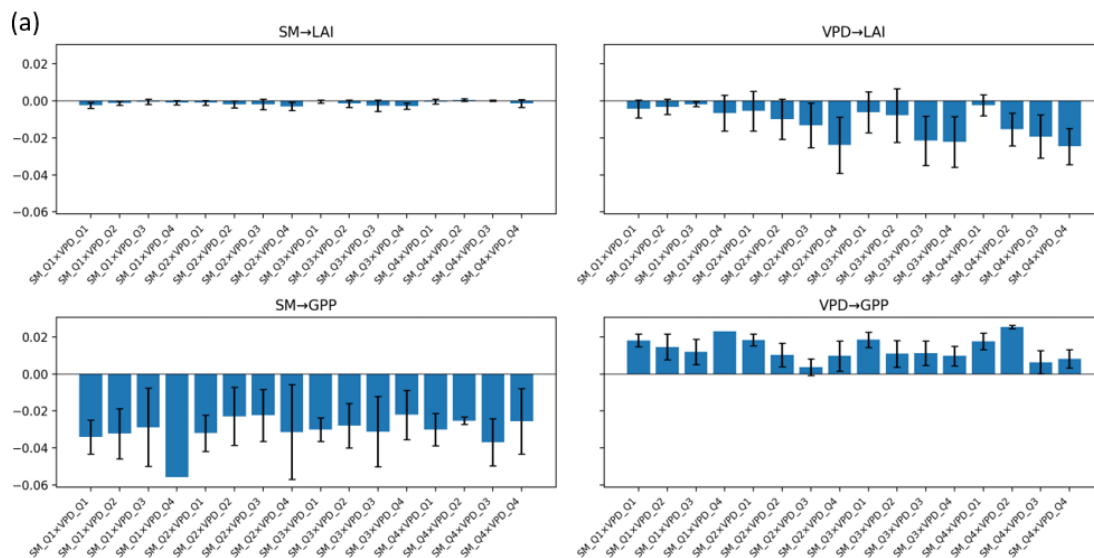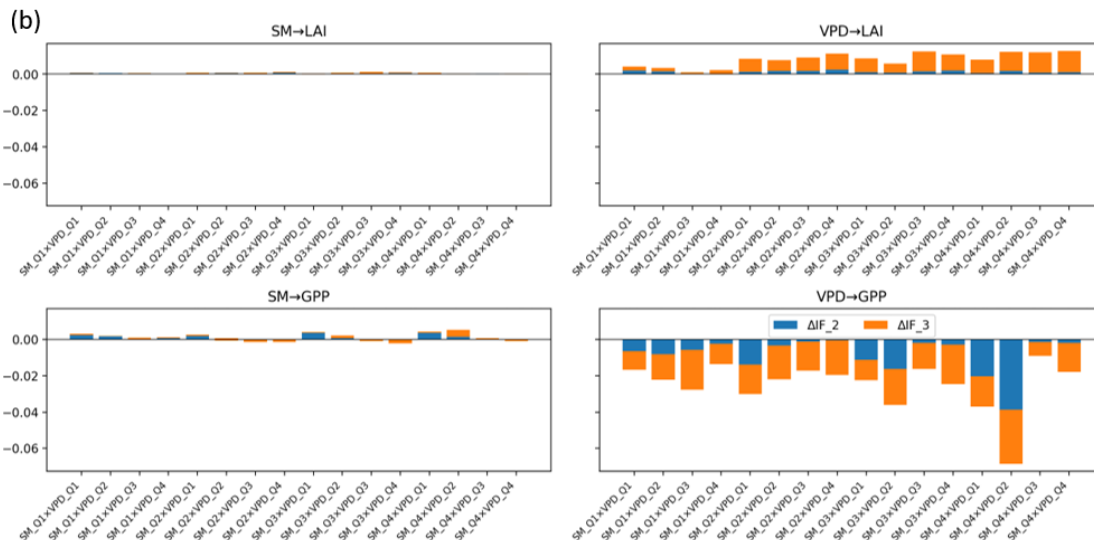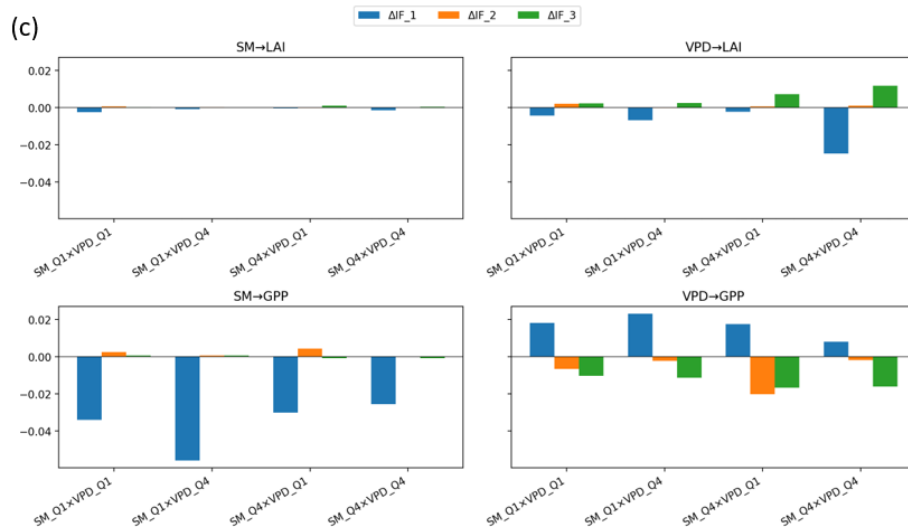

Fig. S2.  $\Delta$ Information Flow ( $\Delta$ IF) for SM $\rightarrow$ LAI, VPD $\rightarrow$ LAI, SM $\rightarrow$ GPP, and VPD $\rightarrow$ GPP across combined quartiles of soil moisture (SM) and vapor pressure deficit (VPD) for southeast China. Each panel illustrates how  $\Delta$ IF varies across environmental regimes defined by water supply (SM: Q1–Q4) and atmospheric demand (VPD: Q1–Q4), shown for three conditioning levels.

(a)  $\Delta$ IF\_1, computed as the difference between the bivariate IF and the IF conditioned only on the paired driver (i.e., SM conditioned on VPD, or VPD conditioned on SM).

(b)  $\Delta$ IF\_2 and  $\Delta$ IF\_3, computed as the difference between the bivariate IF and the IF conditioned on the paired driver and temperature (SM/VPD and T/R respectively).

(c)  $\Delta$ IF\_1,  $\Delta$ IF\_2 and  $\Delta$ IF\_3 represent the differences between the bivariate IF and the multivariate IF under three conditioning schemes.

**$\Delta$ IF\_1:** SM $\rightarrow$ LAI/GPP conditioned on VPD, and VPD $\rightarrow$ LAI/GPP conditioned on SM;

**$\Delta$ IF\_2:** SM $\rightarrow$ LAI/GPP or VPD $\rightarrow$ LAI/GPP conditioned on the paired driver and temperature (SM/VPD + T);

**$\Delta$ IF\_3:** SM $\rightarrow$ LAI/GPP or VPD $\rightarrow$ LAI/GPP conditioned on the paired driver, temperature, and solar surface radiation (SM/VPD + T + SSR).

Across all panels, bar heights indicate the magnitude of  $\Delta$ IF for each SM–VPD quartile combination, with error bars showing the 95% confidence interval. These supplementary plots provide a detailed view of how  $\Delta$ IF responds to changing hydroclimatic conditions and mediator configurations, complementing the combined rIF– $\Delta$ IF diagnostic presented in Figure 4.

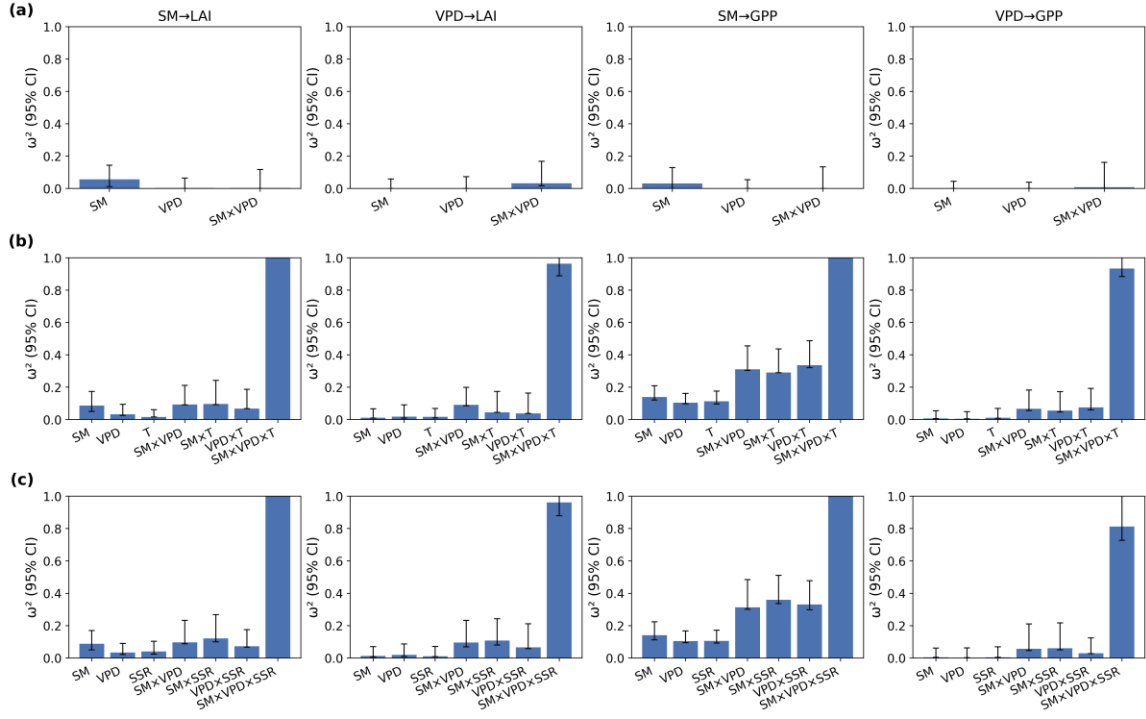

Fig. S3. Fraction of variance ( $\omega^2$ ) for  $|\Delta IF|$  attributed to each ANOVA factor and interaction, corresponding to the same regime structures used in Fig. 5. Bars show the relative dominance of soil moisture (SM), vapor-pressure deficit (VPD), temperature (T), solar radiation (SSR), and their interactions in explaining variability in  $|\Delta IF|$  across pathways.

### SM→LAI: Indices across SM×VPD quartiles

(a)

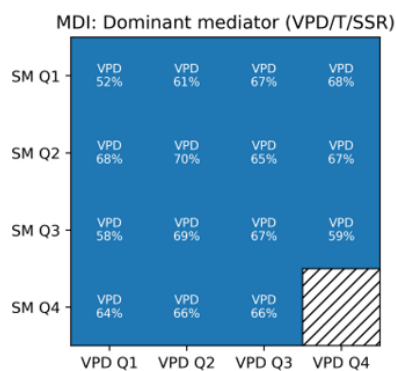

(b)

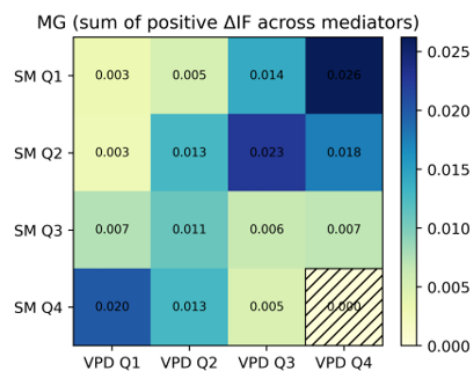

(c)

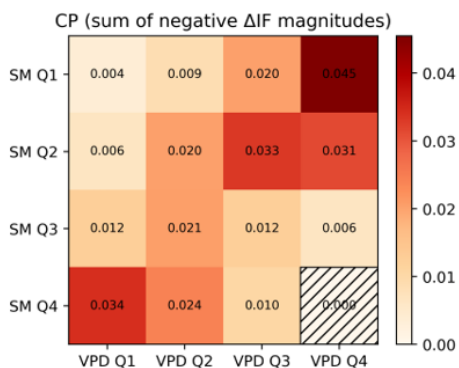

(d)

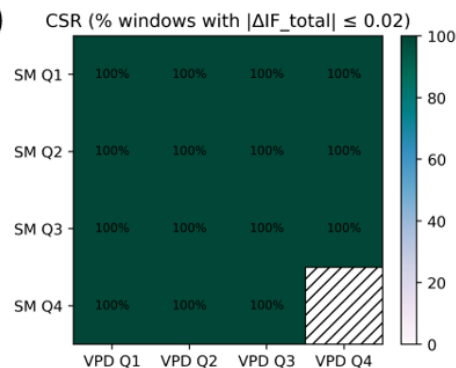

### SM→GPP: Indices across SM×VPD quartiles

(a)

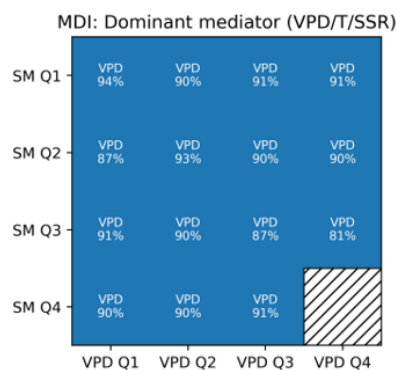

(b)

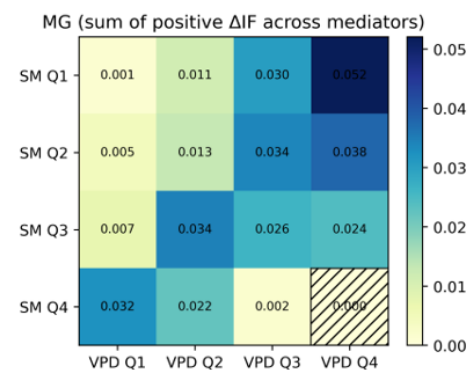

(c)

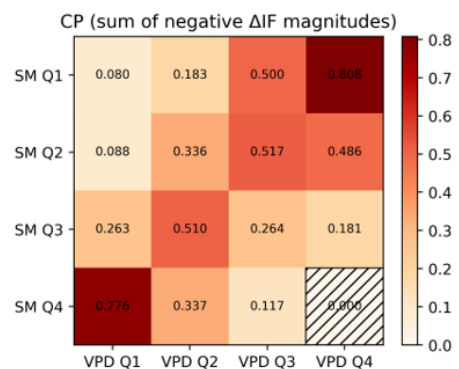

(d)

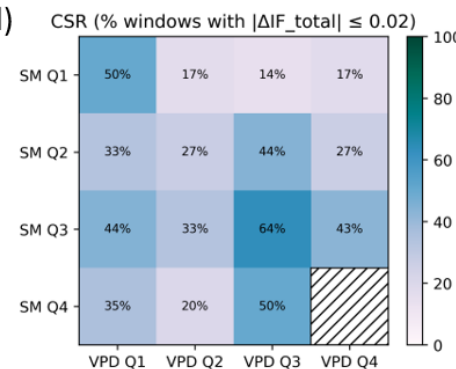

Fig. S4. Mediator-decomposition indices (a: mediator dominance; b: moderation gain; c: confounding pressure; d: causal sufficiency rate) evaluated separately across all SM–VPD quartile regimes for the SM→LAI and SM→GPP pathways.

These panels complement Fig. 6 by illustrating how the importance of mediators varies across distinct hydroclimatic conditions.
